# Supplementary material for: Robust superhydrophobic and self-lubricating PTES-TiO2@UHMWPE fabric and its tribological properties
Source: Royal Society of Chemistry journal article supplement (doi:10.1039/c6ra28255e), 2017-01-01
Supplement: c6ra28255e1.pdf [file c6ra28255e1.pdf]

## Supporting Information

### Robust Superhydrophobic and Self-lubricating PTES- TiO<sub>2</sub>@UHMWPE Fabric and Its Tribological Properties

Deke Li,<sup>1,2</sup> and Zhiguang Guo<sup>1,3</sup>

<sup>1</sup> State Key Laboratory of Solid Lubrication, Lanzhou Institute of Chemical Physics, Chinese Academy of Sciences, Lanzhou 730000, People's Republic of China

<sup>2</sup> University of Chinese Academy of Sciences, Beijing 100049, People's Republic of China

<sup>3</sup> Hubei Collaborative Innovation Centre for Advanced Organic Chemical Materials and Ministry of Education Key Laboratory for the Green Preparation and Application of Functional Materials, Hubei University, Wuhan 430062, People's Republic of China

Correspondence to: Z. Guo (E - mail: zguo@licp.cas.cn)

**This ESI contains:**

Supplementary Fig. 1S:

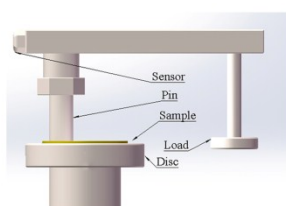

**Fig. 1S** The test principle diagram of the friction and superhydrophobicity abrasion.
